# Supplementary material for: Ionic liquid-based carbon nanotube coated magnetic nanoparticles as adsorbent for the magnetic solid phase extraction of triazole fungicides from environmental water
Source: Royal Society of Chemistry journal article supplement (doi:10.1039/c6ra16682b), 2016-01-01
Supplement: c6ra16682b1.pdf [file c6ra16682b1.pdf]

1 Supplementary information for

2

3 **Ionic liquid-based carbon nanotube coated magnetic**  
4 **nanoparticles as adsorbent for the magnetic solid phase**  
5 **extraction of triazole fungicides from environmental water**

6 Fujiang Chen<sup>1</sup>, Zhiyu Song<sup>1</sup>, Jing Nie<sup>1</sup>, Guowei Yu<sup>1</sup>, Zuguang Li<sup>1\*</sup> and Mawrong Lee<sup>2</sup>

7 (<sup>1</sup>College of Chemical Engineering, Zhejiang University of Technology, Hangzhou,  
8 China, 310014.

9 <sup>2</sup>Department of Chemistry, National Chung-Hsing University, Taichung, Taiwan,  
10 40227 )

11

12

13

14 \*Address for correspondence:

15 College of Chemical Engineering, Zhejiang University of Technology,

16 No. 16, Chaowang Road, Xiacheng District, Hangzhou, Zhejiang Province, China;

17 Tel.: (86)-571-88320306, Fax: (86)-571-88320238, E-mail: lzg@zjut.edu.cn

18

19

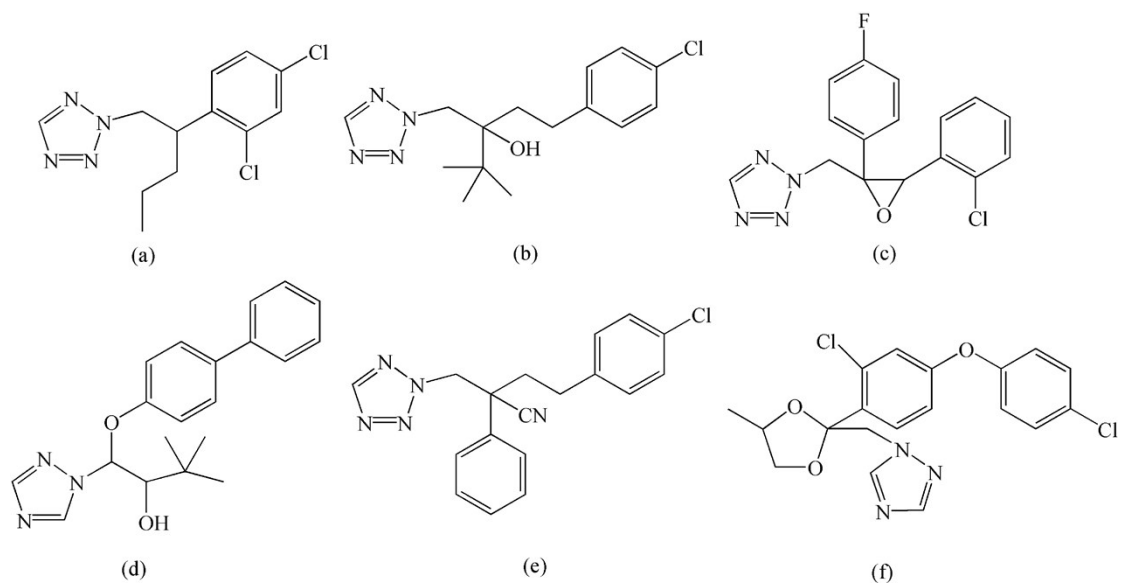

Fig. S1 The structure of 6 triazole fungicides. (a) Penconazole, (b) Tebuconazole, (c) Epoxiconazole, (d) Bitertanol, (e) Fenbuconazole, and (f) Difenconazole.

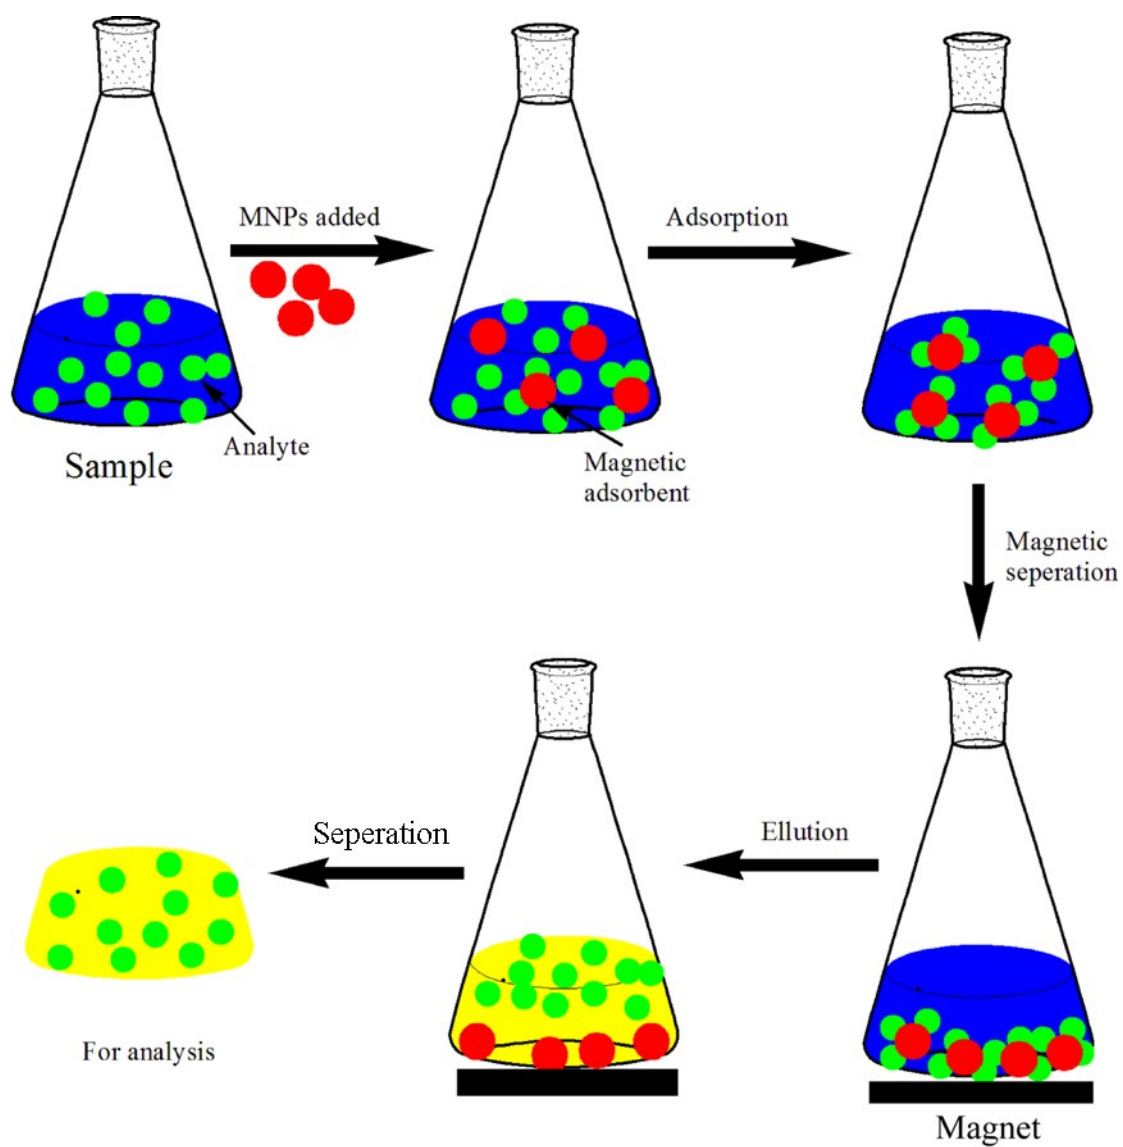

30

31 Fig. S2 The MSPE procedures for determination of six triazole fungicides in  
 32 environmental water.

33

34
